# Supplementary material for: Structural diversity and luminescence properties of coordination polymers based on mixed ligands, 2,5-bis(imidazol-1-yl)thiophene (thim2) and aromatic multicarboxylates
Source: Royal Society of Chemistry journal article supplement (doi:10.1039/c4ce00927d), 2014-01-01
Supplement: c4ce00927d1.pdf [file c4ce00927d1.pdf]

## **Electronic Supplementary Information (ESI)**

# **Structural Diversity and Luminescent Properties of Coordination Polymers Based on 2,5-Bis(Imidazol-1-yl)Thiophene (Thim<sub>2</sub>) and Aromatic Multicarboxylates**

*Namita Singh and Ganapathi Anantharaman\**

Department of Chemistry, Indian Institute of Technology (IIT), Kanpur – 208016, INDIA

**Table S1.** Selected bond distances (Å) and angles(°) for CPs 1-7

| <b>1</b>                                       |            |                     |            |                     |            |
|------------------------------------------------|------------|---------------------|------------|---------------------|------------|
| Zn(1)-O(1)                                     | 1.949(4)   | Zn(1)-O(3)          | 1.971(4)   | Zn(1)-N(1)          | 2.014(4)   |
|                                                |            |                     |            | Zn(1)-N(4)          | 2.018(5)   |
| O(1)-Zn(1)-O(3)#1                              | 107.76(16) | O(3)#1-Zn(1)-N(1)   | 95.51(17)  | O(3)#1-Zn(1)-N(4)#2 | 110.55(18) |
| O(1)-Zn(1)-N(1)                                | 122.23(17) | O(1)-Zn(1)-N(4)#2   | 114.47(18) | N(1)-Zn(1)-N(4)#2   | 104.57(19) |
| #1= x+1/2,-y+1/2,z+1/2, #2 -x+1/2,y+1/2,-z+5/2 |            |                     |            |                     |            |
| <b>2</b>                                       |            |                     |            |                     |            |
| Co(1)-O(2)                                     | 1.966(2)   | Co(1)-O(3)#1        | 2.015(3)   | Co(1)-N(1)          | 2.040(3)   |
|                                                |            |                     |            | Co(1)-N(4)#2        | 2.046(3)   |
| O(2)-Co(1)-O(3)#1                              | 97.68(10)  | O(3)#1-Co(1)-N(1)   | 121.00(12) | O(3)#1-Co(1)-N(4)#2 | 111.77(11) |
| O(2)-Co(1)-N(1)                                | 105.75(11) | O(2)-Co(1)-N(4)#2   | 115.81(11) | N(1)-Co(1)-N(4)#2   | 105.13(11) |
| #1 x+1,y,z, #2 -x+3/2,-y+1,z+1/2               |            |                     |            |                     |            |
| <b>3</b>                                       |            |                     |            |                     |            |
| Co(1)-O(1)                                     | 1.967(4)   | Co(1)-O(5)#1        | 1.989(4)   | Co(1)-N(4)#2        | 2.011(4)   |
|                                                |            |                     |            | Co(1)-N(1)          | 2.044(5)   |
| O(1)-Co(1)-O(5)#1                              | 107.28(17) | O(5)#1-Co(1)-N(4)#2 | 116.83(18) | O(5)#1-Co(1)-N(1)   | 106.90(18) |
| O(1)-Co(1)-N(4)#2                              | 107.95(18) | O(1)-Co(1)-N(1)     | 95.17(17)  | N(4)#2-Co(1)-N(1)   | 119.95(19) |
| #1 x+1/2,-y+1/2,z+1/2 #2 -x+3/2,y-1/2,-z+3/2   |            |                     |            |                     |            |
| <b>4</b>                                       |            |                     |            |                     |            |
| Zn(1)-O(1)                                     | 1.959(5)   | Zn(1)-O(5)#1        | 1.976(5)   | Zn(1)-N(1)          | 1.986(5)   |
|                                                |            |                     |            | Zn(1)-N(4)#2        | 2.017(6)   |
| O(1)-Zn(1)-O(5)#1                              | 109.2(2)   | O(5)#1-Zn(1)-N(1)   | 114.9(2)   | O(5)#1-Zn(1)-N(4)#2 | 106.0(2)   |
| O(1)-Zn(1)-N(1)                                | 110.1(2)   | O(1)-Zn(1)-N(4)#2   | 96.2(2)    | N(1)-Zn(1)-N(4)#2   | 118.6(2)   |
| #1 x-1/2,-y+1/2,z+1/2 #2 -x+1/2,y+1/2,-z+1/2   |            |                     |            |                     |            |
| <b>5</b>                                       |            |                     |            |                     |            |
| Co(1)-O(4)#1                                   | 1.979(2)   | Co(1)-O(1)          | 1.998(2)   | Co(1)-N(4)#2        | 2.029(3)   |
|                                                |            |                     |            | Co(1)-N(1)          | 2.052(3)   |
| O(4)#1-Co(1)-O(1)                              | 102.13(10) | O(1)-Co(1)-N(4)#2   | 122.84(11) | O(1)-Co(1)-N(1)     | 113.38(10) |
| O(4)#1-Co(1)-N(4)#2                            | 112.22(10) | O(4)#1-Co(1)-N(1)   | 94.80(10)  | N(4)#2-Co(1)-N(1)   | 107.78(11) |
| #1 x+1/2,-y+5/2,z+1/2 #2 x,y+1,z               |            |                     |            |                     |            |
| <b>6</b>                                       |            |                     |            |                     |            |

|                                                                                |            |                     |            |                     |            |
|--------------------------------------------------------------------------------|------------|---------------------|------------|---------------------|------------|
| Zn(1)-O(1)                                                                     | 1.963(3)   | Zn(1)-O(4)#1        | 1.963(2)   | Zn(1)-N(1)          | 2.010(3)   |
|                                                                                |            |                     |            | Zn(1)-N(4)#2        | 2.041(3)   |
| O(1)-Zn(1)-O(4)#1                                                              | 105.04(11) | O(4)#1-Zn(1)-N(1)   | 114.84(11) | O(4)#1-Zn(1)-N(4)#2 | 95.01(11)  |
| O(1)-Zn(1)-N(1)                                                                | 117.06(12) | O(1)-Zn(1)-N(4)#2   | 115.96(12) | N(1)-Zn(1)-N(4)#2   | 107.01(12) |
| #1 $x-1/2, -y+3/2, z-1/2$ #2 $x, y+1, z$                                       |            |                     |            |                     |            |
| 7                                                                              |            |                     |            |                     |            |
| Mn(1)-O(1)                                                                     | 2.125(3)   | Mn(1)-O(7)#2        | 2.295(3)   | Mn(2)-O(6)          | 2.203(3)   |
| Mn(1)-O(5)                                                                     | 2.135(3)   | Mn(1)-O(8)#2        | 2.350(3)   | Mn(2)-O(9W)         | 2.204(3)   |
| Mn(1)-N(1)                                                                     | 2.238(3)   | Mn(2)-O(2)          | 2.119(3)   | Mn(2)-N(5)          | 2.254(3)   |
| Mn(1)-N(8)#1                                                                   | 2.263(3)   | Mn(2)-O(4)#3        | 2.182(3)   | Mn(2)-N(4)#4        | 2.273(3)   |
| O(1)-Mn(1)-O(5)                                                                | 114.29(11) | O(1)-Mn(1)-O(8)#2   | 158.10(10) | O(6)-Mn(2)-O(9W)    | 102.14(11) |
| O(1)-Mn(1)-N(1)                                                                | 89.65(11)  | O(5)-Mn(1)-O(8)#2   | 86.57(10)  | O(2)-Mn(2)-N(5)     | 98.11(11)  |
| O(5)-Mn(1)-N(1)                                                                | 100.01(11) | N(1)-Mn(1)-O(8)#2   | 93.28(11)  | O(4)#3-Mn(2)-N(5)   | 98.14(12)  |
| O(1)-Mn(1)-N(8)#1                                                              | 82.55(11)  | N(8)#1-Mn(1)-O(8)#2 | 88.06(11)  | O(6)-Mn(2)-N(5)     | 90.29(12)  |
| O(5)-Mn(1)-N(8)#1                                                              | 98.37(11)  | O(7)#2-Mn(1)-O(8)#2 | 56.55(10)  | O(9W)-Mn(2)-N(5)    | 82.86(12)  |
| N(1)-Mn(1)-N(8)#1                                                              | 161.62(12) | O(2)-Mn(2)-O(4)#3   | 84.85(11)  | O(2)-Mn(2)-N(4)#4   | 89.14(11)  |
| O(1)-Mn(1)-O(7)#2                                                              | 102.31(10) | O(2)-Mn(2)-O(6)     | 89.34(10)  | O(4)#3-Mn(2)-N(4)#4 | 89.95(12)  |
| O(5)-Mn(1)-O(7)#2                                                              | 143.12(11) | O(4)#3-Mn(2)-O(6)   | 170.35(10) | O(6)-Mn(2)-N(4)#4   | 82.25(12)  |
| N(1)-Mn(1)-O(7)#2                                                              | 84.02(10)  | O(2)-Mn(2)-O(9W)    | 168.48(11) | O(9W)-Mn(2)-N(4)#4  | 91.55(12)  |
| N(8)#1-Mn(1)-O(7)#2                                                            | 81.45(11)  | O(4)#3-Mn(2)-O(9W)  | 83.65(11)  | N(5)-Mn(2)-N(4)#4   | 169.56(12) |
| #1 $-x, -y, -z+1$ , #2 $x, y-1, z$ , #3 $-x+1, -y+1, -z$ , #4 $-x+2, -y+1, -z$ |            |                     |            |                     |            |

**Table S2.** C–H····O interactions present in **1** and **5-6**

| Compound no. | <i>D</i> –H···· <i>A</i> | H···· <i>A</i><br>Å | <i>D</i> ···· <i>A</i><br>Å | <i>D</i> –H···· <i>A</i><br>(°) |
|--------------|--------------------------|---------------------|-----------------------------|---------------------------------|
| <b>1</b>     | C3–<br>H3····O4          | 2.289(9)            | 3.203(1)                    | 167.00(2)                       |
|              | C5–<br>H5····O4          | 2.596(6)            | 3.496(7)                    | 163.01(5)                       |
| <b>5</b>     | C9–<br>H9····O5          | 2.486(3)            | 3.247(1)                    | 139.12(1)                       |
| <b>6</b>     | C3–<br>H3····O5          | 2.464(2)            | 3.220(8)                    | 138.51(0)                       |

**Table S3.** hydrogen bonding interactions present in **3-4**

| Compound no. | $D-H\cdots A$         | $H\cdots A$<br>Å | $D\cdots A$<br>Å | $D-H\cdots A$<br>(°) |
|--------------|-----------------------|------------------|------------------|----------------------|
| 3            | O3-<br>H3 $\cdots$ O4 | 1.83(5)          | 2.63(5)          | 173.49(5)            |
| 4            | O4-<br>H4 $\cdots$ O3 | 1.82(5)          | 2.62(3)          | 158.40(5)            |

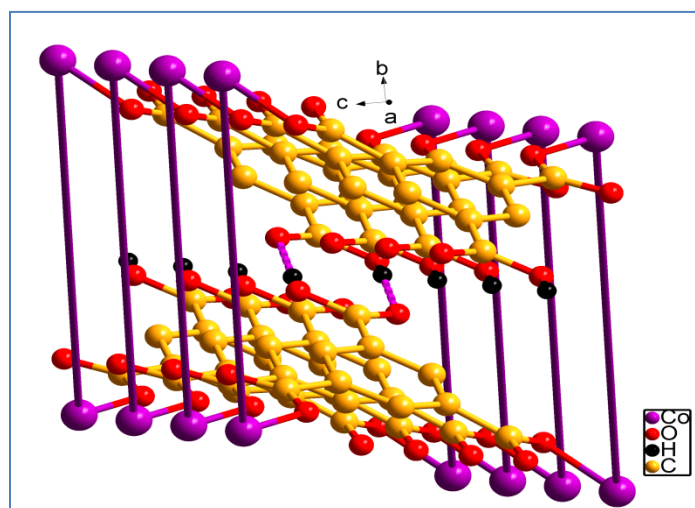

**Figure S1.** Hydrogen bonding interactions between carboxylate groups (thim<sub>2</sub> ligand has been omitted for clarity)

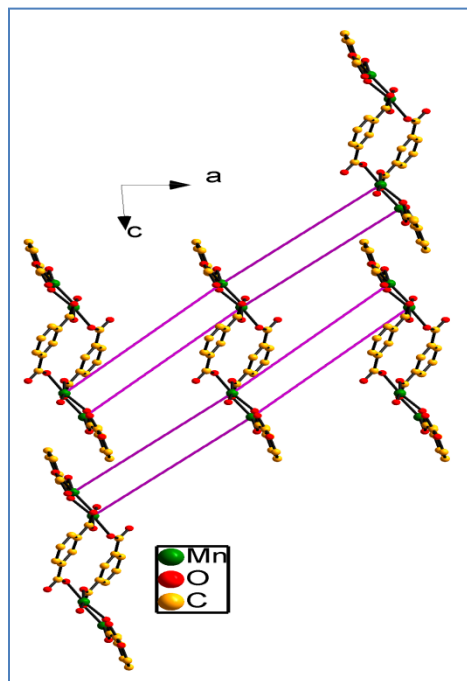

**Figure S2.** View of Connected neighboring 1D chains (thim<sub>2</sub> ligand has been omitted for clarity)

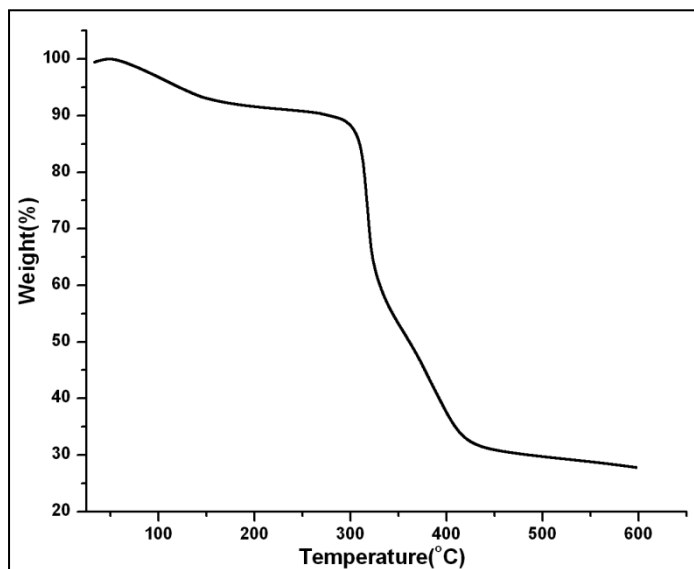

**Figure S3.** Thermogravimetric analysis of **1**.

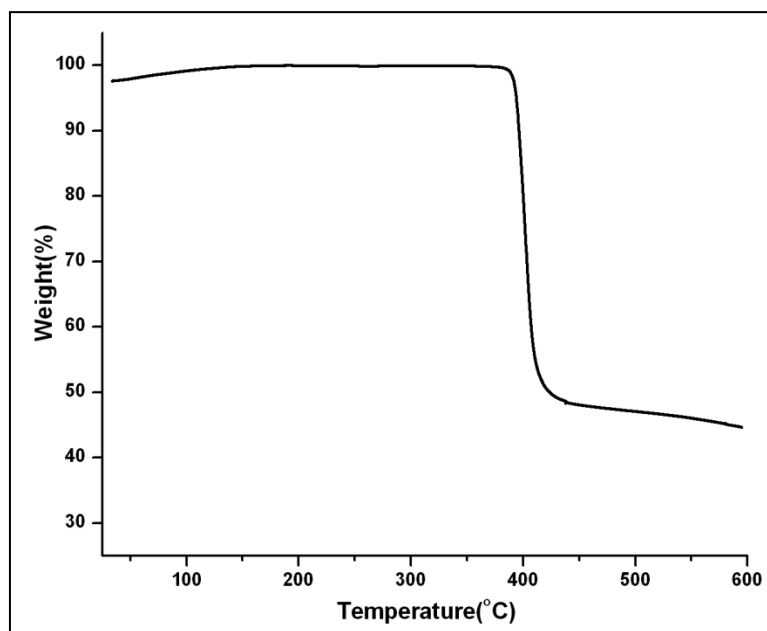

**Figure S4.** Thermogravimetric analysis of **2**.

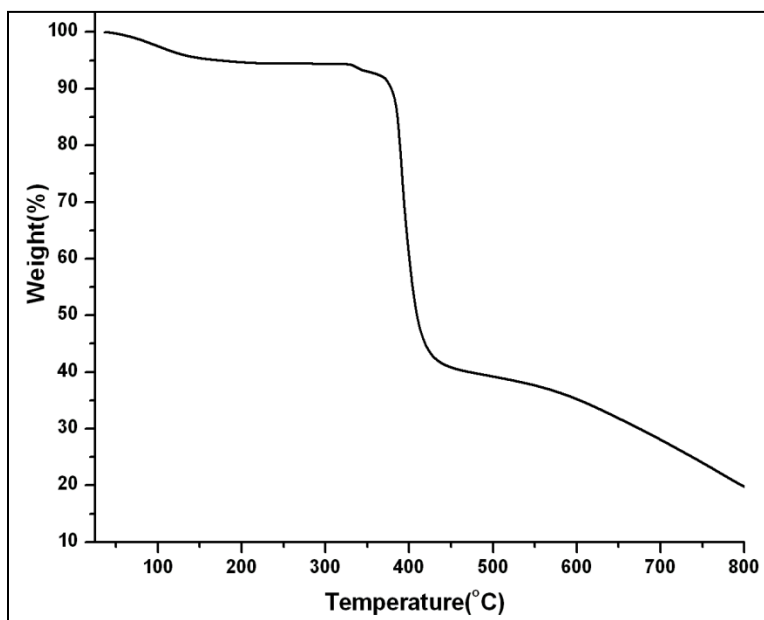

**Figure S5.** Thermogravimetric analysis of **3**.

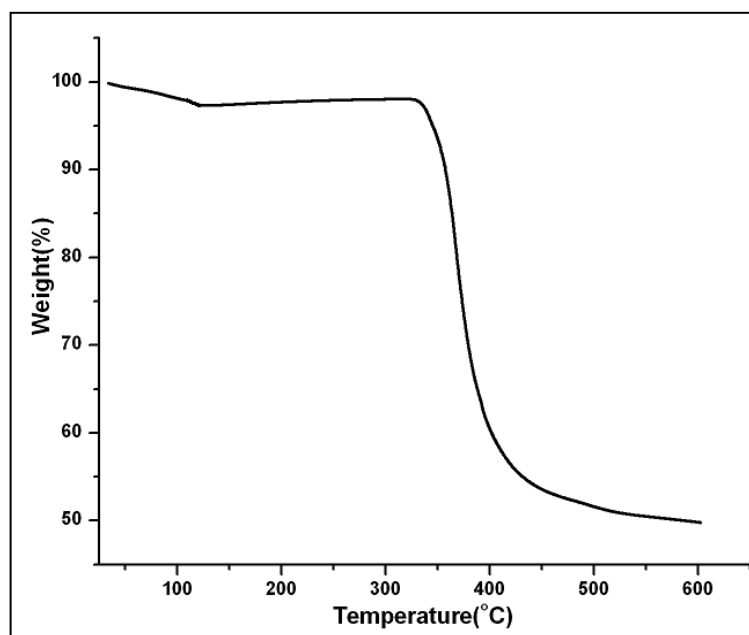

**Figure S6.** Thermogravimetric analysis of **4**.

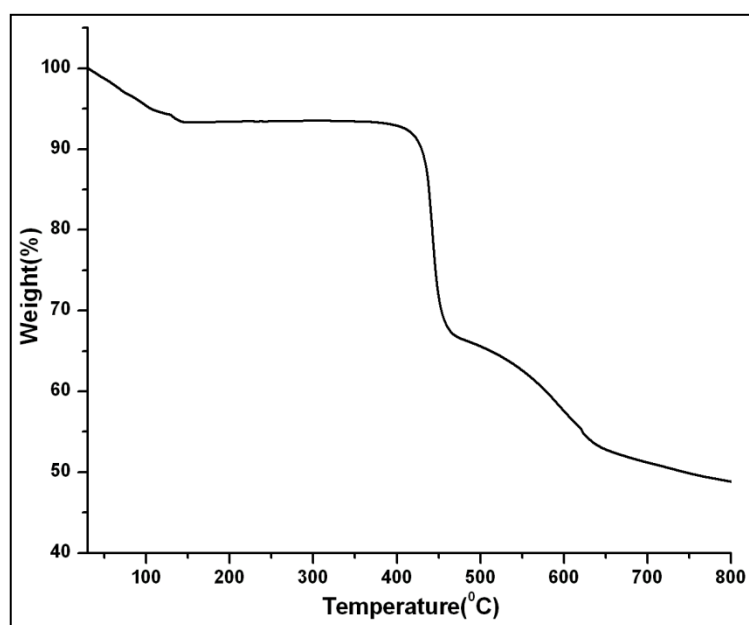

**Figure S7.** Thermogravimetric analysis of **5**.

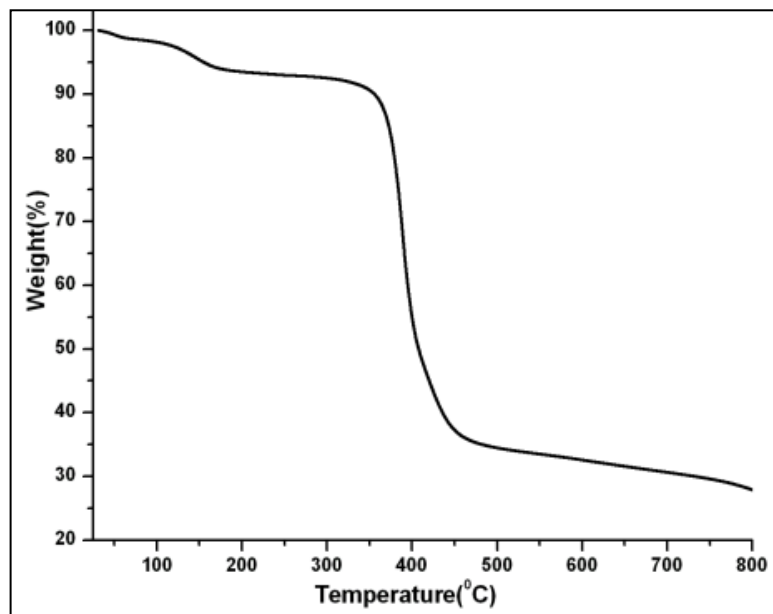

**Figure S8.** Thermogravimetric analysis of **6**.

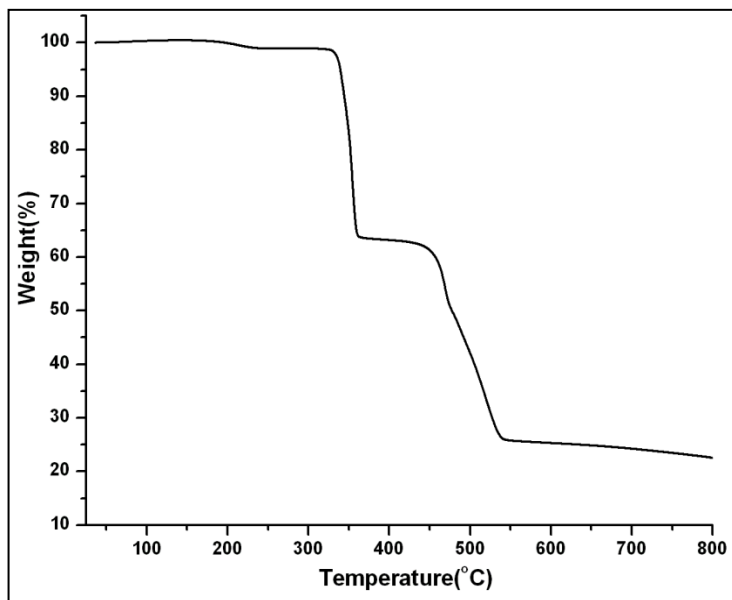



**Figure S9.** Thermogravimetric analysis of 7.

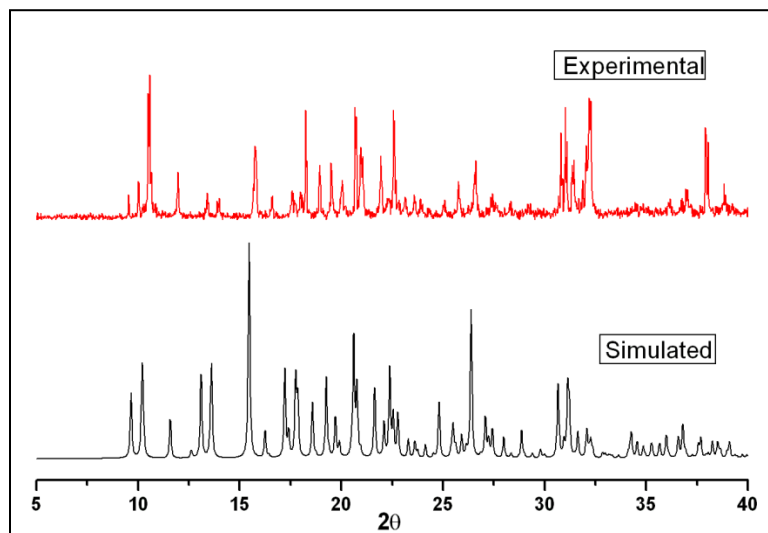

**Figure S10.** PXRD of complex 1

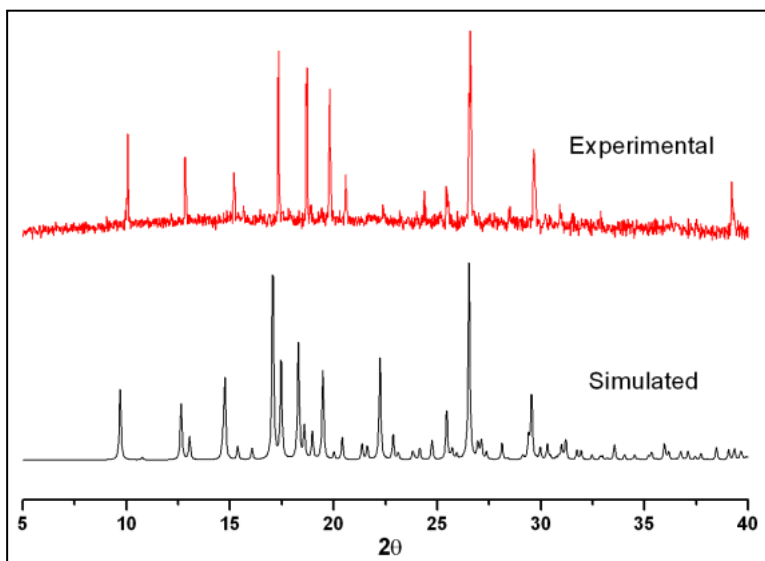

**Figure S11.** PXRD of complex 2

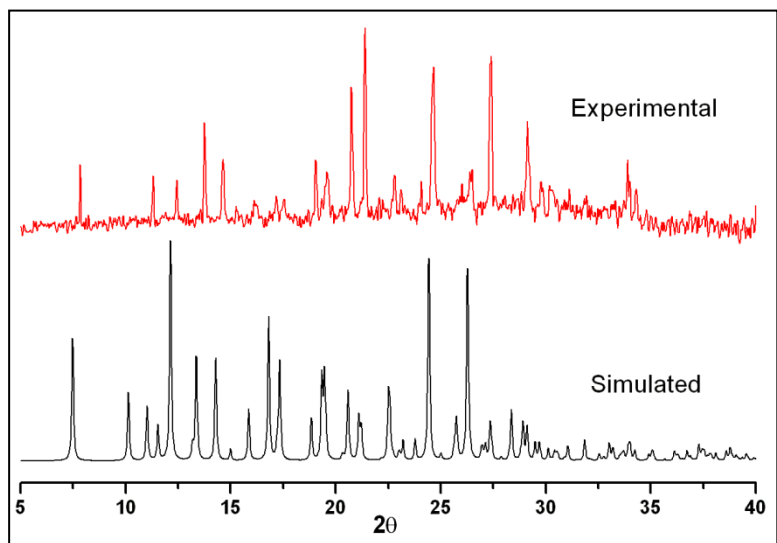

**Figure S12.** PXR D of complex 3

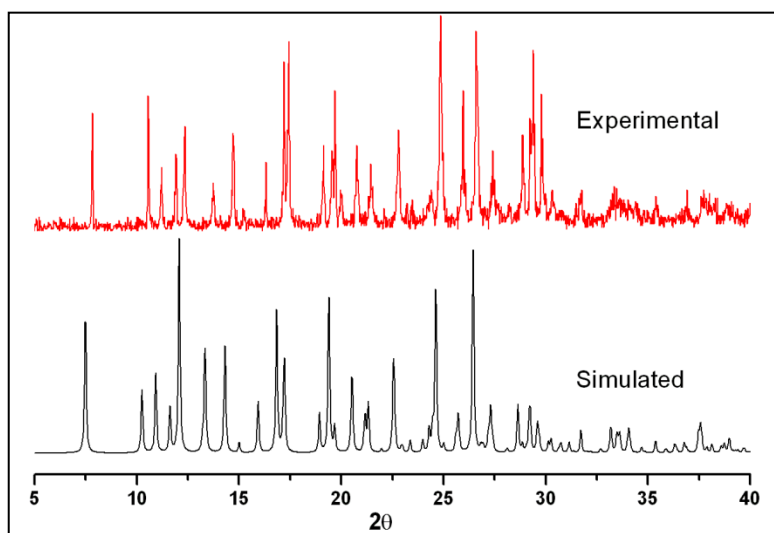

**Figure S13.** PXR D of complex 4

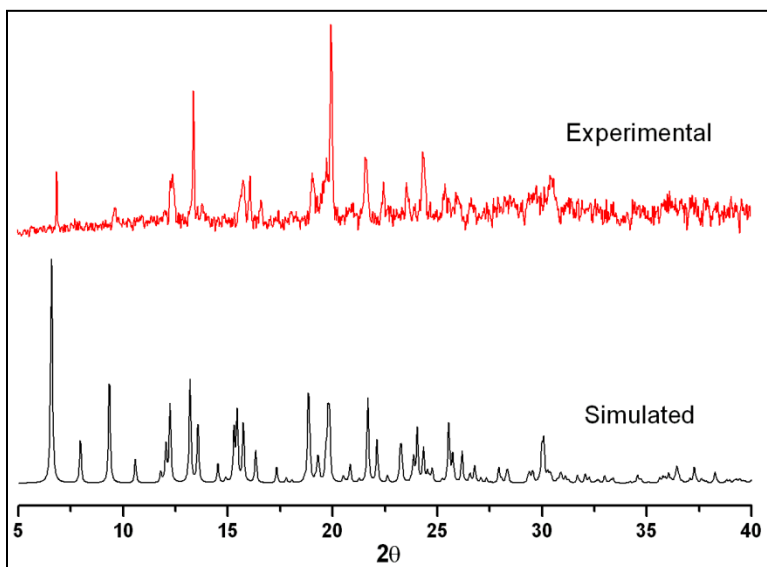

**Figure S14.** PXRD of complex 5

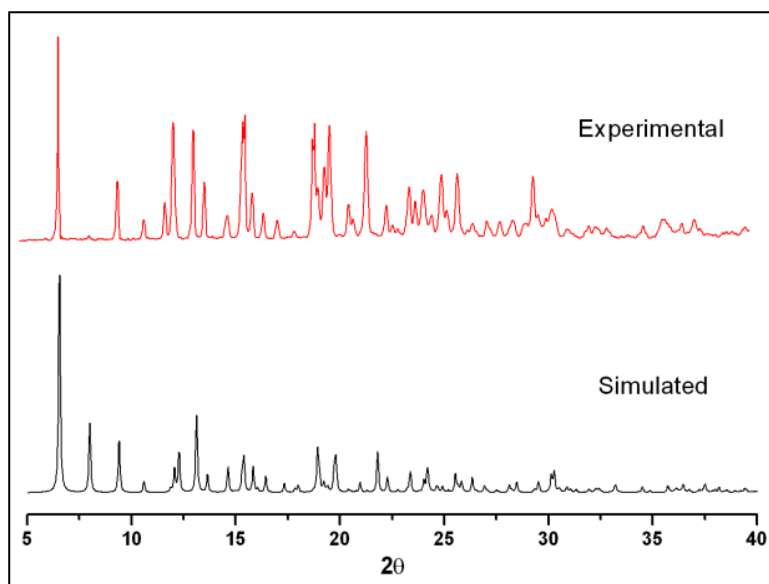

**Figure S15.** PXRD of complex 6

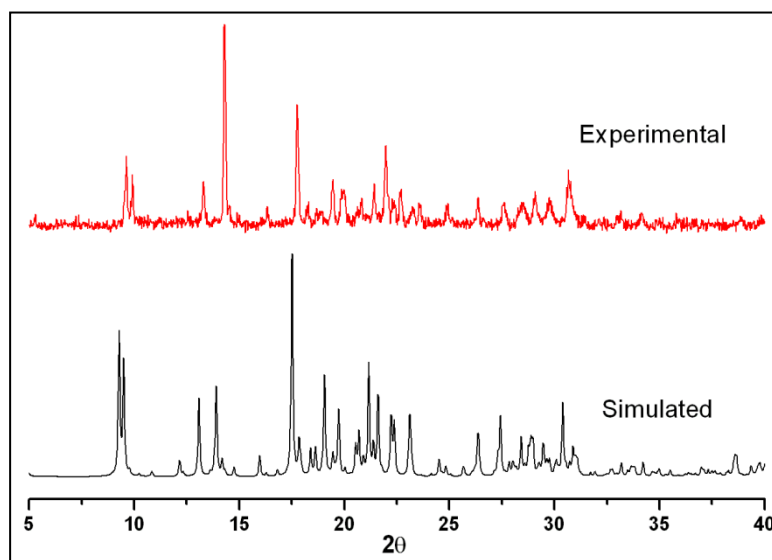

**Figure S16.** PXRD of complex 7
